# Supplementary material for: Why onchocerciasis transmission persists after 15 annual ivermectin mass drug administrations in South-West Cameroon
Source: PubMed Central journal article supplement — BMJ Glob Health. 2021 Jan 11;6(1):e003248. doi: 10.1136/bmjgh-2020-003248 (PMC7802695; doi:10.1136/bmjgh-2020-003248), 2021-01-11
Supplement: bmjgh-2020-003248supp001.pdf [file bmjgh-2020-003248supp001.pdf]

## Supplemental File 1. Variable categorization and selection

### Variable categorization

Age was categorized into six classes: (i) 5-8 years, (ii) 9-14 years, (iii) 15-19 years, (iv) 20-29 years, (v) 30-49 years and (vi)  $\geq 50$  years.

The age cut of 8 years was estimated empirically from the data as delimiting the age group with the lowest *O. volvulus* prevalence, both graphically and statistically using logistic regression. The cut at 15 years was chosen to have participants born before and after CDTI reached 65% coverage (Wanji, Kengne-Ouafo et al. 2015).

Self-reported adherence to CDTI was expressed as the proportion of rounds taken out of the maximum of rounds the person could have taken given their age, i.e. (i) Never taken IVM, (ii) taken  $\leq 50\%$  of rounds, (iii) taken 50-75% of rounds and (iv), taken  $\geq 75\%$  of rounds. Self-reported time since last IVM treatment was categorized as (i) IVM taken in the last year vs. (ii) any other case. For other variables original categories with frequencies below 5% were merged with similar categories.

### Variable selection

Mixed-effects regression models were used to assess the association between each outcome and explanatory variables at a 15% significance level using the Likelihood Ratio Test (LRT). Various cut-offs as well as continuous forms where applicable were considered for age and variables pertaining to adherence to CDTI and albendazole treatment. The variable (and) categorization that (i) was associated at 15% level in the bivariate analysis, (ii) yielded the lowest Akaike Information Criterion (AIC), (iii) where applicable did not result in empty cross categories in the multivariate and (iv) did not yield collinearity in the multivariate model was selected for inclusion in the final multivariate model.

**Supplemental File 2. Study diagram**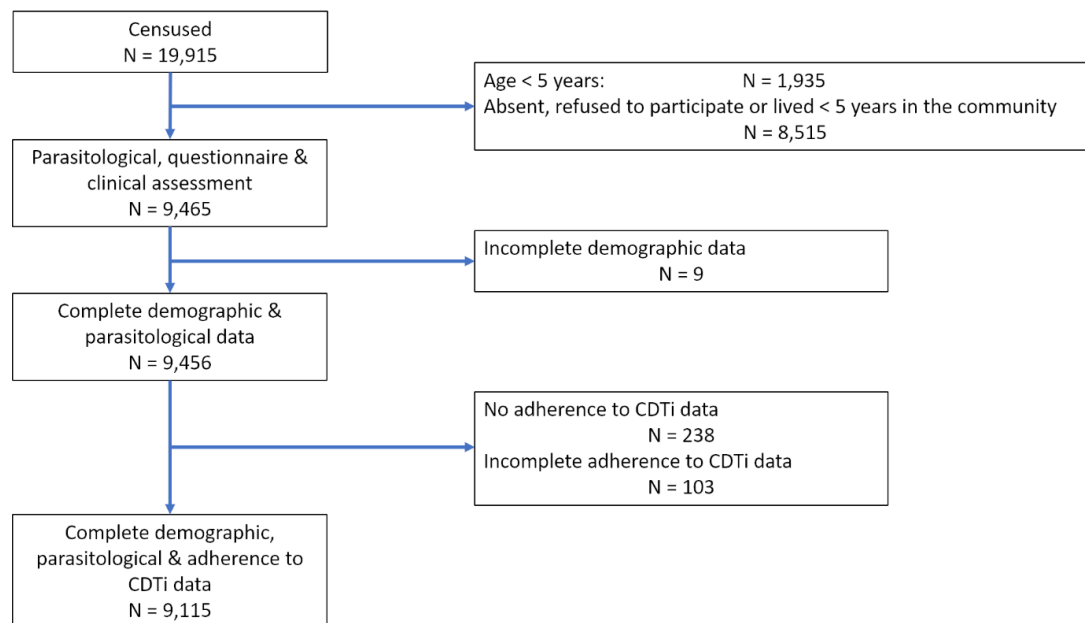

**Supplemental File 3. Participant characteristics**

| Variable                            | Category                        | Enrolled     | Not enrolled | All censused |
|-------------------------------------|---------------------------------|--------------|--------------|--------------|
|                                     |                                 | <b>n (%)</b> | <b>n (%)</b> | <b>n (%)</b> |
| Age                                 | 5-8                             | 1385 (14.7)  | 1149 (13.5)  | 2534 (14.1)  |
|                                     | 9 -14                           | 1962 (20.8)  | 1254 (14.7)  | 3216 (17.9)  |
|                                     | 15-29                           | 2206 (23.3)  | 2994 (35.1)  | 5200 (28.9)  |
|                                     | 30-49                           | 2430 (25.7)  | 2142 (25.1)  | 4572 (25.4)  |
|                                     | ≥50                             | 1473 (15.6)  | 983 (11.5)   | 2456 (13.7)  |
| Gender                              | Men                             | 4577 (48.4)  | 4496 (52.8)  | 9073 (50.5)  |
|                                     | Women                           | 4879 (51.6)  | 4026 (47.2)  | 8905 (49.5)  |
| Occupation                          | Farmer                          | 3946 (41.7)  | 3792 (44.5)  | 7738 (43.0)  |
|                                     | None, child, NA                 | 1385 (14.7)  | 535 (6.3)    | 1920 (10.7)  |
|                                     | Student/Pupil                   | 3711 (39.2)  | 3567 (41.9)  | 7278 (40.5)  |
|                                     | Other: worker, service, liberal | 414 (4.4)    | 628 (7.4)    | 1042 (5.8)   |
| Education attainment                | No school, NA                   | 1849 (19.6)  | 786 (9.2)    | 2635 (14.7)  |
|                                     | Primary or secondary school     | 1524 (16.1)  | 1517 (17.8)  | 3041 (16.9)  |
|                                     | High school and higher          | 6083 (64.3)  | 6219 (73.0)  | 12302 (68.4) |
| Ever taken Albendazole              | No                              | 2570 (27.2)  | -            | -            |
|                                     | Yes, >1 year                    | 1222 (12.9)  | -            | -            |
|                                     | Yes, < 1 year                   | 5409 (57.2)  | -            | -            |
|                                     | Missing, no answer              | 255 (2.7)    | -            | -            |
| Self-reported adherence to CDTI     | Never                           | 2,203 (23.3) | -            | -            |
|                                     | up to 50% of rounds             | 5073 (53.7)  | -            | -            |
|                                     | 50-75% of rounds                | 937 (9.9)    | -            | -            |
|                                     | > 75% of rounds                 | 951 (10.1)   | -            | -            |
|                                     | missing                         | 292 (3.1)    | -            | -            |
| Time since last treatment           | Any other case                  | 4060 (42.9)  | -            | -            |
|                                     | < 1 year                        | 5055 (53.5)  | -            | -            |
|                                     | missing                         | 341 (3.6)    | -            | -            |
| How many times participated in CDTI | missing                         | 292 (3.1)    | -            | -            |
|                                     |                                 | Median; IQR  | -            | -            |
|                                     |                                 | 2; 4         | -            | -            |

Data were obtained from 9,456 participants aged 5 years and over in a cross-sectional survey conducted in 2017 in 20 villages of Southwest Cameroon.

#### Supplemental File 4. Village-level *O. volvulus* prevalence and CMFL and *L. loa* prevalence

| Community      | <i>O. volvulus</i> |            |             |      | <i>Loa loa</i> |            |            |
|----------------|--------------------|------------|-------------|------|----------------|------------|------------|
|                | N                  | Prevalence | 95% CI      | CMFL | N              | Prevalence | 95% CI     |
| Bakumba        | 547                | 53.75      | 49.6 - 57.9 | 2.43 | 539            | 2.6        | 1.4 - 4.3  |
| Betenge        | 211                | 53.55      | 46.8 - 60.3 | 2.79 | 211            | 2.8        | 1.1 - 6.1  |
| Big Butu       | 544                | 39.71      | 35.6 - 43.8 | 1.31 | 538            | 1.5        | 0.6 - 2.9  |
| Big Massaka    | 585                | 58.97      | 55.0 - 63.0 | 2.85 | 576            | 3.1        | 1.9 - 4.5  |
| Big Ngwandi    | 1004               | 35.66      | 32.7 - 38.6 | 1.10 | 995            | 2.0        | 1.2 - 4.9  |
| Bikoki         | 217                | 70.05      | 63.9 - 76.2 | 3.08 | 216            | 2.8        | 1.0 - 5.9  |
| Boa Bakundu    | 1249               | 36.19      | 33.5 - 38.9 | 1.43 | 1224           | 3.0        | 2.1 - 4.1  |
| Bombanda       | 335                | 31.34      | 26.4 - 36.3 | 1.06 | 328            | 6.4        | 4.0 - 9.6  |
| Bombebe        | 373                | 32.17      | 27.4 - 36.9 | 0.82 | 359            | 2.2        | 1.0 - 4.3  |
| Dienyi         | 727                | 53.37      | 49.7 - 57.0 | 2.02 | 720            | 10.6       | 8.4 - 13.0 |
| Kombone        | 805                | 37.64      | 34.3 - 41.0 | 1.57 | 800            | 1.8        | 1.0 - 2.9  |
| Kumu Kumu      | 92                 | 61.96      | 51.9 - 72.1 | 3.59 | 89             | 6.7        | 2.5 - 14.1 |
| Kwa Kwa        | 785                | 41.78      | 38.3 - 45.2 | 1.57 | 776            | 2.1        | 1.2 - 3.3  |
| Lifenja        | 122                | 57.38      | 48.5 - 66.3 | 3.36 | 121            | 1.7        | 0.2 - 5.8  |
| Lokando        | 131                | 58.78      | 50.2 - 67.3 | 1.97 | 130            | 3.8        | 1.3 - 8.7  |
| Metoko Bekondo | 423                | 48.70      | 43.9 - 53.5 | 1.99 | 410            | 11.5       | 8.5 - 15.0 |
| Nake           | 495                | 37.58      | 33.3 - 41.9 | 1.26 | 489            | 3.1        | 1.7 - 5.0  |
| Njombe         | 221                | 57.92      | 51.4 - 64.5 | 2.55 | 221            | 1.4        | 0.3 - 3.9  |
| Small Butu     | 249                | 75.50      | 70.1 - 80.9 | 3.24 | 247            | 4.5        | 2.2 - 7.8  |
| Small Massaka  | 341                | 34.31      | 29.3 - 39.4 | 1.29 | 338            | 2.4        | 1.0 - 4.6  |

CI: confidence interval

## Supplemental File 5. Unadjusted Odds Ratios for mf prevalence &amp; intensity, and nodule prevalence (bivariate models)

| Variable                               | Category                        | Prevalence  |           |         | Infection intensity |           |         | Nodule prevalence |           |         |
|----------------------------------------|---------------------------------|-------------|-----------|---------|---------------------|-----------|---------|-------------------|-----------|---------|
|                                        |                                 | OR          | 95% CI    | p-value | IRR                 | 95% CI    | p-value | OR                | 95% CI    | p-value |
| Gender                                 | Men                             | 1.00        |           |         | 1.00                |           |         | 1.00              |           |         |
|                                        | Women                           | <b>0.83</b> | 0.76-0.90 | <0.0001 | <b>0.86</b>         | 0.81-0.91 | <0.0001 | <b>0.68</b>       | 0.61-0.75 | <0.0001 |
| Age (years)                            | 30-49                           | 1.00        |           |         | 1.00                |           |         | 1.00              |           |         |
|                                        | 5-8                             | <b>0.63</b> | 0.54-0.72 | <0.0001 | <b>0.72</b>         | 0.65-0.81 | <0.0001 | <b>0.22</b>       | 0.17-0.27 | <0.0001 |
|                                        | 9-14                            | <b>1.47</b> | 1.30-1.66 | <0.0001 | <b>1.39</b>         | 1.27-1.51 | <0.0001 | <b>0.39</b>       | 0.33-0.46 | <0.0001 |
|                                        | 15-29                           | <b>1.31</b> | 1.16-1.48 | <0.0001 | <b>1.25</b>         | 1.14-1.36 | <0.0001 | <b>0.70</b>       | 0.60-0.81 | <0.0001 |
|                                        | >=50                            | 1.00        | 0.87-1.14 | 0.995   | 1.01                | 0.92-1.11 | 0.84    | <b>1.30</b>       | 1.12-1.51 | <0.0001 |
| Self-reported adherence <sup>(a)</sup> | Never                           | 1.00        |           |         | 1.00                |           |         |                   |           |         |
|                                        | <50%                            | <b>0.76</b> | 0.68-0.84 | <0.0001 | <b>0.80</b>         | 0.74-0.85 | <0.0001 | <b>1.30</b>       | 1.13-1.49 | <0.0001 |
|                                        | 50-75                           | <b>0.48</b> | 0.41-0.57 | <0.0001 | <b>0.57</b>         | 0.51-0.65 | <0.0001 | 1.14              | 0.92-1.41 | 0.228   |
|                                        | >75                             | <b>0.04</b> | 0.38-0.53 |         | <b>0.56</b>         | 0.50-0.63 | <0.0001 | <b>0.77</b>       | 0.61-0.97 | 0.028   |
| Time since last treatment              | Any other case                  | 1.00        |           |         | 1.00                |           |         | 1.00              |           |         |
|                                        | < 1 year                        | <b>0.60</b> | 0.55-0.65 | <0.0001 | <b>0.69</b>         | 0.65-0.73 | <0.0001 | <b>0.78</b>       | 0.70-0.87 | <0.0001 |
| Occupation                             | Farmer                          | 1.00        |           |         | 1.00                |           |         | 1.00              |           |         |
|                                        | No occupation, child            | 1.10        | 0.97-1.25 | 0.14    | 1.09                | 0.99-1.19 | 0.069   | <b>0.75</b>       | 0.64-0.88 | <0.0001 |
|                                        | Student/Pupil                   | 1.03        | 0.94-1.13 | 0.544   | 1.04                | 0.97-1.11 | 0.246   | <b>0.38</b>       | 0.33-0.43 | <0.0001 |
| Education attainment                   | Other: worker, service, liberal | <b>0.70</b> | 0.57-0.87 | 0.001   | <b>0.74</b>         | 0.62-0.87 | <0.0001 | <b>0.52</b>       | 0.39-0.69 | <0.0001 |
|                                        | No school                       | 1.00        |           |         | 1.00                |           |         | 1.00              |           |         |
|                                        | Primary or secondary school     | 0.88        | 0.76-1.01 | 0.072   | <b>0.89</b>         | 0.81-0.99 | 0.029   | 1.10              | 0.93-1.30 | 0.278   |
|                                        | High school and higher          | 0.93        | 0.84-1.04 | 0.216   | 0.94                | 0.87-1.01 | 0.099   | <b>0.73</b>       | 0.63-0.83 | <0.0001 |

OR: Odds ratio, CI: confidence interval; OR in bold are significant at 5% level.

<sup>(a)</sup>: self-reported adherence was expressed as the proportion of rounds taken out of the maximum rounds a person could have taken given their age.

**Supplemental File 6. Prevalence of OSD and itching in participants aged below and above 15 years.**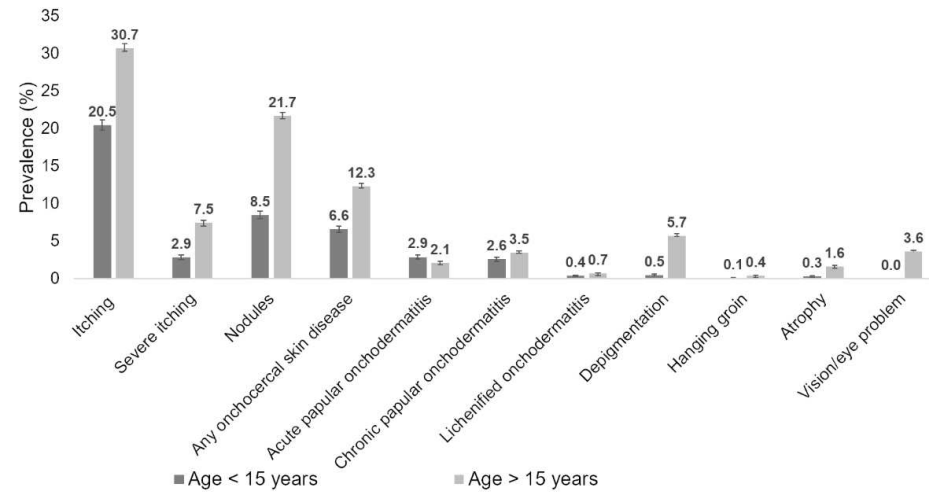

Data were obtained from a 2017 cross-sectional survey of 9,456 participants aged 5 years and over living in 20 communities of Southwest Cameroon.

Supplemental File 7. Association between OSD, adherence to CDTI and *O. volvulus* infection (adjusted ORs / multivariate model)

| Variable                               | Category                        | APOD        |           |         | CPOD        |           |         | Depigmentation |           |         | Atrophy     |           |         |
|----------------------------------------|---------------------------------|-------------|-----------|---------|-------------|-----------|---------|----------------|-----------|---------|-------------|-----------|---------|
|                                        |                                 | OR          | 95% CI    | p-value | OR          | 95% CI    | p-value | OR             | 95% CI    | p-value | OR          | 95% CI    | p-value |
| <i>O. volvulus</i> infection status    | -                               | n.a.        |           |         | n.a.        |           |         | n.a.           |           |         | 1.28        | 0.85-1.94 | 0.241   |
| <i>O. volvulus</i> mf load             | -                               | n.a.        |           |         | n.a.        |           |         | <b>1.01</b>    | 1.00-1.01 | 0.001   | n.a.        |           |         |
| Number of nodules                      | -                               | <b>1.18</b> | 1.03-1.34 | 0.014   | <b>1.12</b> | 1.00-1.25 | 0.047   | <b>1.45</b>    | 1.27-1.66 | <0.0001 | 1.08        | 0.92-1.27 | 0.319   |
| Number of nodules, squared             | -                               | n.a.        |           |         | n.a.        |           |         | <b>0.99</b>    | 0.97-1.00 | 0.043   | n.a.        |           |         |
| Age (years)                            | 30-49                           | 1.00        |           |         | 1.00        |           |         | 1.00           |           |         | 1.00        |           |         |
|                                        | 5-8                             | 1.12        | 0.58-2.14 | 0.735   | <b>0.51</b> | 0.28-0.93 | 0.027   | <b>0.11</b>    | 0.04-1.29 | <0.0001 | 0.35        | 0.10-1.12 | 0.089   |
|                                        | 9-14                            | 1.39        | 0.78-2.48 | 0.259   | 0.96        | 0.59-1.58 | 0.886   | <b>0.12</b>    | 0.05-0.30 | <0.0001 | <b>0.13</b> | 0.03-0.53 | 0.004   |
|                                        | 15-29                           | 1.30        | 0.82-2.07 | 0.264   | 1.29        | 0.89-1.86 | 0.174   | <b>0.20</b>    | 0.12-0.36 | <0.0001 | <b>0.25</b> | 0.10-0.62 | 0.003   |
|                                        | ≥50                             | <b>0.48</b> | 0.27-0.87 | 0.015   | 0.97        | 0.66-1.44 | 0.881   | <b>3.39</b>    | 2.61-4.40 | <0.0001 | <b>2.51</b> | 1.56-4.05 | <0.0001 |
| Gender                                 | Men                             | 1.00        |           |         | 1.00        |           |         | 1.00           |           |         | 1.00        |           |         |
|                                        | Women                           | 1.18        | 0.89-1.55 | 0.251   | 0.95        | 0.74-1.20 | 0.644   | 0.82           | 0.65-1.04 | 0.106   | 0.93        | 0.62-1.41 | 0.742   |
| Self-reported adherence <sup>(a)</sup> | Never                           | 1.00        |           |         | 1.00        |           |         | 1.00           |           |         | 1.00        |           |         |
|                                        | up to 50% of rounds             | <b>1.79</b> | 1.14-2.82 | 0.011   | 1.18        | 0.82-1.69 | 0.374   | 0.81           | 0.59-1.11 | 0.198   | 0.99        | 0.58-1.73 | 0.999   |
|                                        | 50-75% of rounds                | <b>2.36</b> | 1.28-4.36 | 0.006   | 1.33        | 0.78-2.25 | 0.292   | 0.80           | 0.50-1.27 | 0.345   | 0.87        | 0.38-2.01 | 0.749   |
|                                        | > 75% of rounds                 | <b>2.20</b> | 1.20-4.03 | 0.011   | 1.63        | 0.96-2.78 | 0.07    | 0.64           | 0.36-1.15 | 0.136   | 0.48        | 0.15-1.54 | 0.255   |
| Time since last treatment              | Any other case                  | 1.00        |           |         | 1.00        |           |         | 1.00           |           |         | 1.00        |           |         |
|                                        | < 1 year                        | 0.73        | 0.51-1.04 | 0.08    | 0.76        | 0.56-1.03 | 0.077   | 0.86           | 0.65-1.14 | 0.298   | 0.75        | 0.45-1.24 | 0.260   |
| Occupation                             | Farmer                          | 1.00        |           |         | 1.00        |           |         | 1.00           |           |         | 1.00        |           |         |
|                                        | No occupation, child, N/A       | 0.91        | 0.47-1.78 | 0.787   | 1.43        | 0.88-2.32 | 0.144   | 0.77           | 0.54-1.10 | 0.153   | 0.82        | 0.43-1.57 | 0.555   |
|                                        | Student/Pupil                   | 1.31        | 0.78-2.20 | 0.315   | 1.04        | 0.67-1.60 | 0.858   | 0.86           | 0.42-1.77 | 0.676   | 1.27        | 0.43-3.71 | 0.662   |
|                                        | Other: worker, service, liberal | 0.67        | 0.28-1.58 | 0.356   | 1.34        | 0.78-2.29 | 0.29    | 1.11           | 0.63-1.98 | 0.714   | 1.08        | 0.38-3.07 | 0.884   |
| Education attainment                   | No school                       | 1.00        |           |         | 1.00        |           |         | 1.00           |           |         | 1.00        |           |         |
|                                        | Primary or secondary school     | 0.70        | 0.35-1.40 | 0.314   | 0.83        | 0.49-1.40 | 0.477   | <b>0.39</b>    | 0.26-0.57 | <0.0001 | 0.56        | 0.28-1.10 | 0.092   |
|                                        | High school and higher          | 0.83        | 0.45-1.53 | 0.557   | 1.10        | 0.70-1.72 | 0.686   | <b>0.60</b>    | 0.45-0.82 | 0.001   | 0.61        | 0.35-1.07 | 0.083   |

APOD: acute papular onychodermatitis, CPOD: chronic papular onychodermatitis; n.a.: non-applicable

OR: Odds ratio, CI: confidence interval; OR in bold are significant at 5% level

<sup>(a)</sup>: self-reported adherence was expressed as the proportion of rounds taken out of the maximum rounds a person could have taken given their age

No models were run for lichenified onychodermatitis and hanging groin due to the small sample size (58 lichenified onychodermatitis and 31 hanging groin cases, respectively).

**Supplemental File 8. Marginal predictions of OSD and itching prevalence by age group.**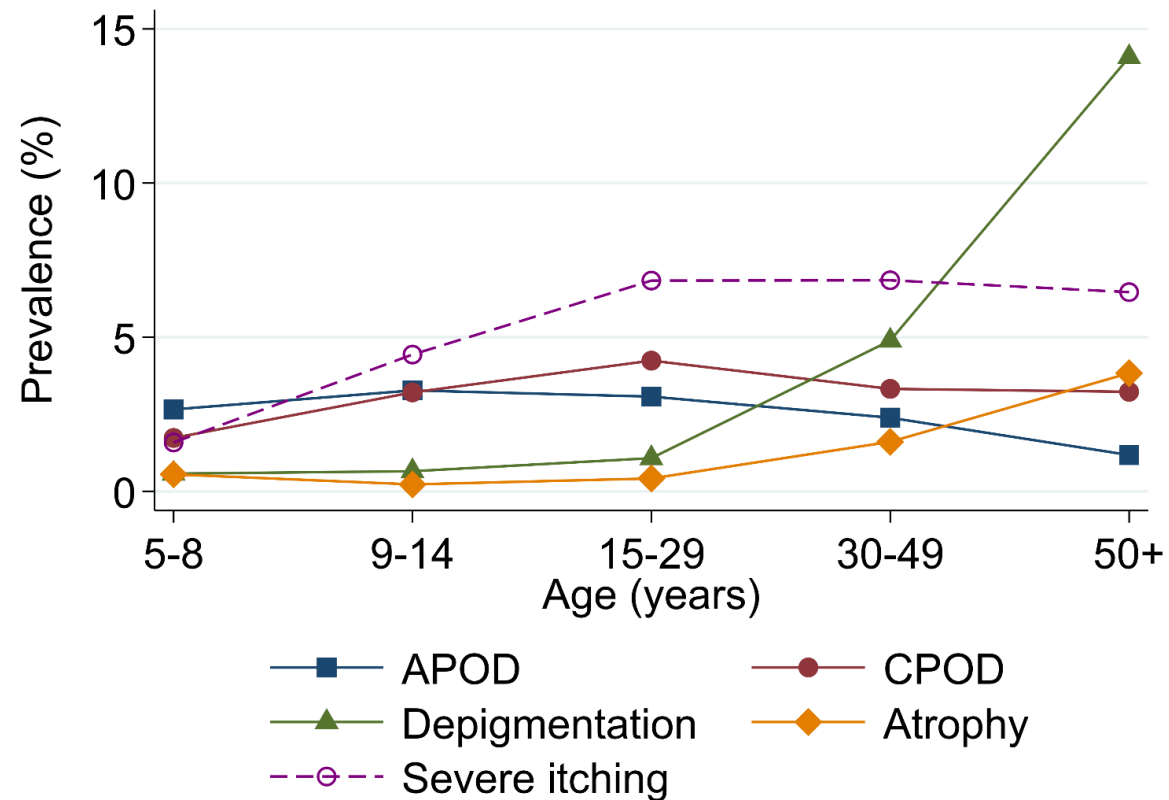

Marginal predictions obtained with the multivariate models presented in SupplementalSupplemental File 7 (OSD) and SupplementalSupplemental File 10 (severe itching). Data were obtained from a 2017 cross-sectional survey of 9,115 (9,094 for severe itching due to missing data for albendazole treatment) participants aged 5 years and over living in 20 communities of Southwest Cameroon.



## Supplemental File 9. Unadjusted Odds Ratio for skin disease and severe itching (unadjusted odds ratio / bivariate models)

| Variable                            | Category                        | APOD |           |         | CPOD |           |         | Depigmentation |           |         | Atrophy |           |         | Severe itching |           |         |
|-------------------------------------|---------------------------------|------|-----------|---------|------|-----------|---------|----------------|-----------|---------|---------|-----------|---------|----------------|-----------|---------|
|                                     |                                 | OR   | 95%CI     | p-value | OR   | 95%CI     | p-value | OR             | 95%CI     | p-value | OR      | 95%CI     | p-value | OR             | 95%CI     | p-value |
| <i>O. volvulus</i> infection status | NA                              | 1.06 | 0.81-1.38 | 0.677   | 1.08 | 0.86-1.37 | 0.510   | 1.42           | 1.14-1.76 | 0.001   | 1.44    | 0.98-2.13 | 0.060   | 0.98           | 0.82-1.17 | 0.799   |
| mf load (nb/snip)                   | NA                              | 1.00 | 1.00-1.01 | 0.189   | 1.00 | 1.00-1.01 | 0.461   | 1.01           | 1.00-1.01 | <0.0001 | 1.00    | 0.99-1.01 | 0.88    | 1.00           | 1.00-1.01 | 0.037   |
| Nodule number                       | NA                              | 1.11 | 0.97-1.26 | 0.13    | 1.13 | 1.02-1.26 | 0.024   | 1.53           | 1.41-1.66 | <0.0001 | 1.23    | 1.08-1.41 | 0.002   | 1.16           | 1.07-1.26 | <0.0001 |
| Gender                              | Men                             | 1.00 | NA        | NA      | 1.00 | NA        | NA      | 1.00           | NA        | NA      | 1.00    | NA        | NA      | 1.00           | NA        | NA      |
|                                     | Women                           | 1.12 | 0.86-1.47 | 0.386   | 0.96 | 0.76-1.21 | 0.751   | 0.95           | 0.77-1.17 | 0.648   | 1.08    | 0.74-1.58 | 0.701   | 1.27           | 1.07-1.52 | 0.007   |
| Age (years)                         | 30-49                           | 1.00 | NA        | NA      | 1.00 | NA        | NA      | 1.00           | NA        | NA      | 1.00    | NA        | NA      | 1.00           | NA        | NA      |
|                                     | 5-8                             | 1.21 | 0.78-1.89 | 0.394   | 0.57 | 0.36-0.90 | 0.016   | 0.10           | 0.04-0.23 | <0.0001 | 0.37    | 0.16-0.84 | 0.018   | 0.16           | 0.10-0.27 | <0.0001 |
|                                     | 9-14                            | 1.55 | 1.06-2.26 | 0.024   | 1.01 | 0.72-1.41 | 0.973   | 0.11           | 0.06-0.21 | <0.0001 | 0.14    | 0.05-0.40 | <0.0001 | 0.47           | 0.36-0.62 | <0.0001 |
|                                     | 15-29                           | 1.38 | 0.95-2.02 | 0.093   | 1.28 | 0.94-1.75 | 0.117   | 0.20           | 0.12-0.32 | <0.0001 | 0.26    | 0.12-0.57 | 0.001   | 0.86           | 0.69-1.08 | 0.206   |
|                                     | >=50                            | 0.55 | 0.32-0.95 | 0.033   | 0.96 | 0.66-1.40 | 0.845   | 4.02           | 3.14-5.13 | <0.0001 | 2.81    | 1.81-4.36 | <0.0001 | 1.02           | 0.80-1.30 | 0.89    |
| Self-reported adherence (a)         | Never                           | 1.00 | NA        | NA      | 1.00 | NA        | NA      | 1.00           | NA        | NA      | 1.00    | NA        | NA      | 1.00           | NA        | NA      |
|                                     | <50%                            | 1.42 | 0.99-2.04 | 0.058   | 1.17 | 0.87      | 0.313   | 0.94           | 0.73-1.21 | 0.628   | 0.91    | 0.58-1.43 | 0.688   | 1.69           | 1.33-2.15 | <0.0001 |
|                                     | 50-75                           | 1.56 | 0.93-2.60 | 0.091   | 1.13 | 0.72      | 0.586   | 1.08           | 0.74-1.58 | 0.701   | 0.92    | 0.46-1.88 | 0.829   | 1.60           | 1.13-2.27 | 0.009   |
|                                     | >75                             | 1.65 | 0.99-2.76 | 0.055   | 1.13 | 0.72      | 0.595   | 0.50           | 0.30-0.82 | 0.006   | 0.35    | 0.12-1.01 | 0.051   | 1.55           | 1.09-2.20 | 0.014   |
| Time since last treatment           | Any other case                  | 1.00 | NA        | NA      | 1.00 | NA        | NA      | 1.00           | NA        | NA      | 1.00    | NA        | NA      | 1.00           | NA        | NA      |
|                                     | < 1 year                        | 1.11 | 0.84-1.46 | 0.471   | 0.87 | 0.69      | 0.268   | 0.62           | 0.50-0.77 | <0.0001 | 0.56    | 0.38-0.84 | 0.005   | 1.07           | 0.89-1.28 | 0.471   |
| Occupation                          | Farmer                          | 1.00 | NA        | NA      | 1.00 | NA        | NA      | 1.00           | NA        | NA      | 1.00    | NA        | NA      | 1.00           | NA        | NA      |
|                                     | No occupation, child            | 1.18 | 0.77-1.81 | 0.446   | 1.31 | 0.94      | 0.11    | 0.68           | 0.51-0.91 | 0.008   | 0.83    | 0.50-1.38 | 0.473   | 0.84           | 0.66-1.07 | 0.169   |
|                                     | Student/Pupil                   | 1.71 | 1.27-2.31 | <0.0001 | 0.95 | 0.73      | 0.703   | 0.07           | 0.05-0.12 | <0.0001 | 0.18    | 0.10-0.33 | <0.0001 | 0.43           | 0.35-0.54 | <0.0001 |
|                                     | Other: worker, service, liberal | 0.89 | 0.40-1.94 | 0.763   | 1.35 | 0.80      | 0.26    | 0.46           | 0.26-0.79 | 0.005   | 0.53    | 0.19-1.47 | 0.221   | 0.64           | 0.41-1.00 | 0.049   |
| Education attainment                | No school                       | 1.00 | NA        | NA      | 1.00 | NA        | NA      | 1.00           | NA        | NA      | 1.00    | NA        | NA      | 1.00           | NA        | NA      |
|                                     | Primary or secondary school     | 0.86 | 0.52-1.42 | 0.554   | 0.76 | 0.51      | 0.174   | 0.40           | 0.29-0.56 | <0.0001 | 0.49    | 0.27      | 0.016   | 1.01           | 0.77      | 0.967   |
|                                     | High school and higher          | 1.31 | 0.91-1.88 | 0.142   | 0.89 | 0.67      | 0.414   | 0.31           | 0.24-0.39 | <0.0001 | 0.32    | 0.21      | <0.0001 | 0.71           | 0.57      | 0.002   |

APOD: acute papular onychodermatitis; CPOD: chronic papular onychodermatitis;

OR: odds ratio, CI: confidence interval; NA: not applicable; OR in bold are significant at 5% level.

(a): self-reported adherence was expressed as the proportion of rounds taken out of the maximum rounds a person could have taken given their age.

### Supplemental File 10. Factors and symptoms associated with severe itching (adjusted ORs / multivariate model)

| Variable                                    | Category                  | OR          | 95% CI     | p-value |
|---------------------------------------------|---------------------------|-------------|------------|---------|
| Infection intensity (mf load)               |                           | 1.00        | 1.00-1.01  | 0.057   |
| Presence of nodules                         | No                        | 1.00        |            |         |
|                                             | Yes                       | 1.23        | 0.98-1.55  | 0.074   |
| Age (years)                                 | 30-49                     | 1.00        |            |         |
|                                             | 5-8                       | <b>0.21</b> | 0.11-0.37  | <0.0001 |
|                                             | 9-14                      | <b>0.60</b> | 0.40-0.89  | 0.012   |
|                                             | 15-29                     | 0.99        | 0.75-1.30  | 0.918   |
|                                             | ≥50                       | 0.94        | 0.72-1.24  | 0.66    |
| Sex                                         | Men                       | 1.00        |            |         |
|                                             | Women                     | <b>1.28</b> | 1.06-1.55  | 0.01    |
| Self-reported adherence <sup>(a)</sup>      | Never                     | 1.00        |            |         |
|                                             | up to 50% of rounds       | <b>1.40</b> | 1.01-1.93  | 0.041   |
|                                             | 50-75% of rounds          | 1.35        | 0.87-2.11  | 0.18    |
|                                             | > 75% of rounds           | <b>2.06</b> | 1.32-3.23  | 0.002   |
| Time since last treatment                   | Any other case            | 1.00        |            |         |
|                                             | < 1 year                  | 1.03        | 0.74-1.42  | 0.866   |
| APOD                                        | No                        | 1.00        |            |         |
|                                             | Yes                       | <b>3.79</b> | 2.58-5.56  | <0.0001 |
| CPOD                                        | No                        | 1.00        |            |         |
|                                             | Yes                       | <b>6.63</b> | 4.91-8.96  | <0.0001 |
| LOD                                         | No                        | 1.00        |            |         |
|                                             | Yes                       | <b>8.11</b> | 4.42-14.87 | <0.0001 |
| Depigmentation                              | No                        | 1.00        |            |         |
|                                             | Yes                       | 1.40        | 0.95-2.04  | 0.086   |
| Atrophy                                     | No                        | 1.00        |            |         |
|                                             | Yes                       | 1.14        | 0.56-2.35  | 0.717   |
| Hanging groin                               | No                        | 1.00        |            |         |
|                                             | Yes                       | 1.20        | 0.34-4.30  | 0.779   |
| Non-onchocercal skin disease <sup>(b)</sup> | No                        | 1.00        |            |         |
|                                             | Yes                       | 1.41        | 0.88-2.26  | 0.149   |
| Occupation                                  | Farmer                    | 1.00        |            |         |
|                                             | No occupation, child, N/A | 1.01        | 0.71-1.43  | 0.972   |
|                                             | Student/Pupil             | 0.79        | 0.56-1.13  | 0.198   |
|                                             | Other <sup>(c)</sup>      | 0.68        | 0.42-1.10  | 0.114   |
| Education attainment                        | No school                 | 1.00        |            |         |
|                                             | Primary or secondary      | 0.97        | 0.68-1.40  | 0.889   |
|                                             | ≥ High school             | 0.94        | 0.68-1.30  | 0.721   |
| Taken albendazole                           | Never                     | 1.00        |            |         |
|                                             | Yes, > 1 year ago         | 0.82        | 0.59-1.13  | 0.229   |
|                                             | Yes, < 1 year ago         | 0.83        | 0.63-1.10  | 0.202   |

OR: Odds ratio, CI: confidence interval; OR in bold are significant at 95% level.

APOD: acute papular onchodermatitis; CPOD: chronic papular onchodermatitis, LOD: lichenified onchodermatitis;

<sup>(a)</sup> self-reported adherence was expressed as the proportion of rounds taken out of the maximum rounds a person could have taken given their age.

<sup>(b)</sup> non-onchocercal skin diseases included scabies, pyoderma and dermatophytes.

<sup>(c)</sup> occupation classified as "other" included small businesses, workers, civil servants and liberal professions

Results were obtained by a multivariate mixed logistic regression model and data from a cross-sectional survey conducted in 2017 among 9,115 participants with complete data living in 20 communities of Southwest Cameroon.

**Supplemental File 11. Participants in the qualitative assessments**

| Age (years)  | Community members who accepted IVM |       | Community members who refused IVM |       | Community Drug Distributors |       |
|--------------|------------------------------------|-------|-----------------------------------|-------|-----------------------------|-------|
|              | Men                                | Women | Men                               | Women | Men                         | Women |
| 15-20        | 2                                  | 1     | 1                                 | 2     | 0                           | 0     |
| 21-30        | 2                                  | 2     | 1                                 | 4     | 4                           | 3     |
| 31-40        | 2                                  | 2     | 2                                 | 3     | 8                           | 4     |
| 41-50        | 2                                  | 3     | 1                                 | 1     | 1                           | 3     |
| 51-60        | 2                                  | 3     | 0                                 | 0     | 2                           | 0     |
| 60+          | 2                                  | 1     | 0                                 | 1     | 1                           | 0     |
| Sub totals 1 | 12                                 | 12    | 5                                 | 11    | 16                          | 10    |
| Sub totals 2 | 24                                 |       | 16                                |       | 26                          |       |
| Total        |                                    |       | 66                                |       |                             |       |

## Supplemental File 12. Perceived adverse events of Ivermectin

| Reported adverse event                                                                                                                                                                                                                                                                                                                                                                                                                                                                                                                                                                                                                                                                                                       | Perceived causes of adverse events                                                                                                             | Consequences of adverse events                                                                                                                                                                                                                                                                                                                                                                                                                                                                                                                                           | Prevention and Management of adverse events                                                                                                                                                                                                                                                                                                                                                                                                                                                                                                                                                                                                                                                                                                                                                                                                                                                                                                                                                                                                                                                                    |
|------------------------------------------------------------------------------------------------------------------------------------------------------------------------------------------------------------------------------------------------------------------------------------------------------------------------------------------------------------------------------------------------------------------------------------------------------------------------------------------------------------------------------------------------------------------------------------------------------------------------------------------------------------------------------------------------------------------------------|------------------------------------------------------------------------------------------------------------------------------------------------|--------------------------------------------------------------------------------------------------------------------------------------------------------------------------------------------------------------------------------------------------------------------------------------------------------------------------------------------------------------------------------------------------------------------------------------------------------------------------------------------------------------------------------------------------------------------------|----------------------------------------------------------------------------------------------------------------------------------------------------------------------------------------------------------------------------------------------------------------------------------------------------------------------------------------------------------------------------------------------------------------------------------------------------------------------------------------------------------------------------------------------------------------------------------------------------------------------------------------------------------------------------------------------------------------------------------------------------------------------------------------------------------------------------------------------------------------------------------------------------------------------------------------------------------------------------------------------------------------------------------------------------------------------------------------------------------------|
| <ul style="list-style-type: none"> <li>Swelling</li> <li>Increased itching<br/>Making other diseases worse especially hernias and epilepsy<br/><i>'Because there was a man who was having hernia. The hernia was not yet visible.. It was just hiding in his body but immediately he took Mectizan, the hernia became worse until he couldn't walk'.</i> (Community member, woman, aged 15-20 years)</li> <li>Infertility</li> <li>Miscarriage<br/><i>'I was refusing to drink Mectizan because they said it aborts pregnancies, I feared drinking the Mectizan; I said I will never drink Mectizan, I was scared'</i> (Community member, woman, aged -31-40 years)</li> <li>Boils</li> <li>Rashes</li> <li>Death</li> </ul> | <ul style="list-style-type: none"> <li>Meeting unknown disease in the body</li> <li>Meeting filaria in the body</li> <li>Witchcraft</li> </ul> | <ul style="list-style-type: none"> <li>Having economic expense due to needing operation to treat hernias</li> <li>Economic costs of missing work</li> <li>Economic costs of getting treatment from a pharmacy</li> <li>Being a burden on your family</li> <li>Being unable to socially interact due to side effects (especially itching or mobility problems)<br/><i>It makes me to feel uncomfortable when I want to sit with my friends... Because I cannot go and sit amongst my friends and be scratching my skin</i> (Community member, man, aged 15-20)</li> </ul> | <ul style="list-style-type: none"> <li>Taking Mectizan as a lotion<br/><i>'Because when they swallow it they have rashes and their arms or legs get swollen. So they prefer to put it in their lotion to avoid the side effects.'</i> (Community member, man, aged 15-20 years)</li> <li>'Cooler' for minor symptoms<br/><i>'Some people are afraid, but I do my best to enlighten them saying, if they drink it and it leads to fever, what I can give them to cool the fever is Paracetamol and that is what we were taught but if the effects are more than me to handle, I can send them to the health centre'.</i> (CDD, man, aged 31-40 years)</li> <li>Grinded gentamicin for boils</li> <li>Traditional medicine<br/><i>'There are traditional medicines that they used, There are traditional medicines that they used, dropping it in the eyes. There are others who use just the Gentamicin eye drop'</i> (CDD, man, aged 21-30 years)</li> <li>'Medicated soap'</li> <li>Bathing</li> <li>Treating the 'sickness' that it has provoked.</li> <li>Surgery</li> <li>Hospital/clinic visit</li> </ul> |

CDD: Community Drug Distributor.

**Supplemental File 13. STROBE Statement**

|                              | <b>Item No</b> | <b>Recommendation</b>                                                                                                                                                                                                                                                                                                                                                                                                                                                                                                                                                                               |
|------------------------------|----------------|-----------------------------------------------------------------------------------------------------------------------------------------------------------------------------------------------------------------------------------------------------------------------------------------------------------------------------------------------------------------------------------------------------------------------------------------------------------------------------------------------------------------------------------------------------------------------------------------------------|
| <b>Title and abstract</b>    | 1              | (a) Indicate the study's design with a commonly used term in the title or the abstract<br>In the abstract<br>(b) Provide in the abstract an informative and balanced summary of what was done and what was found.                                                                                                                                                                                                                                                                                                                                                                                   |
| <b>Introduction</b>          |                |                                                                                                                                                                                                                                                                                                                                                                                                                                                                                                                                                                                                     |
| Background/rationale         | 2              | Explain the scientific background and rationale for the investigation being reported<br>Page 6. All introduction except last sentence.                                                                                                                                                                                                                                                                                                                                                                                                                                                              |
| Objectives                   | 3              | State specific objectives, including any prespecified hypotheses<br>Page 6-7. Last sentence of the introduction.                                                                                                                                                                                                                                                                                                                                                                                                                                                                                    |
| <b>Methods</b>               |                |                                                                                                                                                                                                                                                                                                                                                                                                                                                                                                                                                                                                     |
| Study design                 | 4              | Present key elements of study design early in the paper<br>Methods, section #1 "Study design and participants". Page 7                                                                                                                                                                                                                                                                                                                                                                                                                                                                              |
| Setting                      | 5              | Describe the setting, locations, and relevant dates, including periods of recruitment, exposure, follow-up, and data collection<br>Methods, section #1 "Study design and participants". Page 7<br>Data collection: Methods, section #2 "Parasitological and questionnaire data"; section #3, "Onchocerciasis clinical assessments"; section #4 "Semi-structured qualitative interviews". Page 7-8.                                                                                                                                                                                                  |
| Participants                 | 6              | Give the eligibility criteria, and the sources and methods of selection of participants.<br>Methods, section #1 "Study design and participants"; section #4 "Semi-structured qualitative interviews". Page 7-8.                                                                                                                                                                                                                                                                                                                                                                                     |
| Variables                    | 7              | Clearly define all outcomes, exposures, predictors, potential confounders, and effect modifiers. Give diagnostic criteria, if applicable.<br>Methods, section #2 "Parasitological and questionnaire data" Page 7.; section #3, "Onchocerciasis clinical assessments" Page 8; section 6 "Statistical analysis"; Page 9-10. Supplemental file 1.                                                                                                                                                                                                                                                      |
| Data sources/<br>measurement | 8*             | For each variable of interest, give sources of data and details of methods of assessment (measurement). Describe comparability of assessment methods if there is more than one group.<br>Methods, section #2 "Parasitological and questionnaire data" Page 7; section #3, "Onchocerciasis clinical assessments"; Page 8. section #4 "Semi-structured qualitative interviews". Page 8.                                                                                                                                                                                                               |
| Bias                         | 9              | Describe any efforts to address potential sources of bias<br>Methods section 6 "Statistical analysis" Page 9-10; Supplemental file 1. Results section 1 "Study population and participation in the baseline survey", paragraph 2. Page 11.                                                                                                                                                                                                                                                                                                                                                          |
| Study size                   | 10             | Explain how the study size was arrived at<br><br>Results section#1 "Study population and participation in the baseline survey", paragraph 1. Page 10. Supplemental File 2. Study diagram.                                                                                                                                                                                                                                                                                                                                                                                                           |
| Quantitative variables       | 11             | Explain how quantitative variables were handled in the analyses. If applicable, describe which groupings were chosen and why<br>Methods section 6 "Statistical analysis" Page 9-10. Supplemental file 1. Results section 1, paragraph 2" Page 11.                                                                                                                                                                                                                                                                                                                                                   |
| Statistical methods          | 12             | (a) Describe all statistical methods, including those used to control for confounding<br>Methods section 6 "Statistical analysis" Page 9-10.; Supplemental file 1<br>(b) Describe any methods used to examine subgroups and interactions<br>Methods section 6 "Statistical analysis" Page 9-10.<br>(c) Explain how missing data were addressed<br>Methods section 6 "Statistical analysis" Page 9-10.; Supplemental file 1. Results section 1, paragraph 2" Page 11.<br>(d) If applicable, describe analytical methods taking account of sampling strategy<br>(e) Describe any sensitivity analyses |

|                          |     |                                                                                                                                                                                                                                                                                                                                                                                                                                                                                                                                                                                          |
|--------------------------|-----|------------------------------------------------------------------------------------------------------------------------------------------------------------------------------------------------------------------------------------------------------------------------------------------------------------------------------------------------------------------------------------------------------------------------------------------------------------------------------------------------------------------------------------------------------------------------------------------|
|                          |     | Results section 1 “Study population and participation in the baseline survey” paragraph 2, Page 11; Supplemental file 1.                                                                                                                                                                                                                                                                                                                                                                                                                                                                 |
| <b>Results</b>           |     |                                                                                                                                                                                                                                                                                                                                                                                                                                                                                                                                                                                          |
| Participants             | 13* | (a) Report numbers of individuals at each stage of study—eg numbers potentially eligible, examined for eligibility, confirmed eligible, included in the study, completing follow-up, and analysed.<br>Results section 1 “Study population and participation in the baseline survey”, paragraph 1, Page 10-11. Supplemental File 2 & 3.<br>(b) Give reasons for non-participation at each stage<br>Results section 1 “Study population and participation in the baseline survey”, paragraph 1, Page 10. Supplemental File 2.<br>(c) Consider use of a flow diagram<br>Supplemental File 2 |
| Descriptive data         | 14* | (a) Give characteristics of study participants (eg demographic, clinical, social) and information on exposures and potential confounders.<br>Supplemental File 3. Figure 2.<br>Indicate number of participants with missing data for each variable of interest<br>Supplemental File 3                                                                                                                                                                                                                                                                                                    |
| Outcome data             | 15* | Report numbers of outcome events or summary measures<br>Results, Section #2, “ <i>O. volvulus</i> infection levels, adherence to CDTI and prevalence of <i>Loa loa</i> ”, Page 11; Section #4 “Prevalence of disease”, Page 14.; Supplemental Files 4 & 6.                                                                                                                                                                                                                                                                                                                               |
| Main results             | 16  | Give unadjusted estimates and, if applicable, confounder-adjusted estimates and their precision (eg, 95% confidence interval). Make clear which confounders were adjusted for and why they were included<br>Unadjusted estimates: Supplemental Files 5 & 9.<br>Confounder adjusted estimates: Table 1, Supplemental Files 7 & 10.<br>Report category boundaries when continuous variables were categorized<br>Tables 2, 3 and 4. Supplemental Tables 2 & 3.<br>If relevant, consider translating estimates of relative risk into absolute risk for a meaningful time period              |
| Other analyses           | 17  | Report other analyses done—e.g. analyses of subgroups and interactions, and sensitivity analyses<br>Results section 1 “Study population and participation in the baseline survey”, paragraph 2. Page 11.                                                                                                                                                                                                                                                                                                                                                                                 |
| <b>Discussion</b>        |     |                                                                                                                                                                                                                                                                                                                                                                                                                                                                                                                                                                                          |
| Key results              | 18  | Summarise key results with reference to study objectives<br>Done throughout the discussion. Page 20-25                                                                                                                                                                                                                                                                                                                                                                                                                                                                                   |
| Limitations              | 19  | Discuss limitations of the study, taking into account sources of potential bias or imprecision. Discuss both direction and magnitude of any potential bias<br>Paragraph “Limitations”. Page 24                                                                                                                                                                                                                                                                                                                                                                                           |
| Interpretation           | 20  | Give a cautious overall interpretation of results considering objectives, limitations, multiplicity of analyses, results from similar studies, and other relevant evidence<br>Done for each specific topic of the discussion. Page 20-25                                                                                                                                                                                                                                                                                                                                                 |
| Generalisability         | 21  | Discuss the generalisability (external validity) of the study results<br>Conclusion page 25                                                                                                                                                                                                                                                                                                                                                                                                                                                                                              |
| <b>Other information</b> |     |                                                                                                                                                                                                                                                                                                                                                                                                                                                                                                                                                                                          |
| Funding                  | 22  | Give the source of funding and the role of the funders for the present study and, if applicable, for the original study on which the present article is based<br>Footnote on Funding Page 31.                                                                                                                                                                                                                                                                                                                                                                                            |
